Anesthesiology  
74:1171, 1991

## Sudden Cardiac Arrest during Epidural Anesthesia: Venous Air Embolism?

*To the Editor:*—We read the report by Gild and Crilley<sup>1</sup> with interest. While agreeing with their conclusion that this may be a case of unexplained cardiac arrest during epidural anesthesia, we think that a more likely explanation is that the patient suffered an acute venous air embolism that produced the cardiac arrest.

Venous air embolism occurs when there is open access to the venous circulation above the level of the heart, creating a pressure gradient leading to the right atrium. Although this is most often associated with intracranial surgery with the patient in the sitting position,<sup>2</sup> it also has been described during radical hysterectomy<sup>3</sup> and hip arthroplasty.<sup>4</sup>

In the situation described by Gild and Crilley, we postulate that air was entrained through the bone marrow sinuses from the bone-harvesting entry point, which we presume was above the level of the right atrium. In addition, spontaneous respiration creates a negative intrathoracic pressure, which would have increased the pressure gradient and the possibility of air embolism.

The first line of treatment of venous air embolism is prevention of further air entrainment by closing the entry point or increasing the venous pressure. In this case, this was achieved by turning the patient onto her back and administering positive pressure ventilation and cardiac massage. Her quick response to these measures and the absence of subsequent cardiovascular sequelae (indicating that she had no cardiac pathology) may also corroborate our contention that the cardiac arrest was due to an acute temporary event such as venous air embolism.

Anesthesiology  
74:1171–1172, 1991

## How Best to Monitor for Detection of Myocardial Ischemia?

*To the Editor:*—In their previous studies, Slogoff and Keats<sup>1–3</sup> have provided convincing evidence that in patients having coronary artery bypass surgery, myocardial ischemia prior to cardiopulmonary bypass is associated with increased risk of postoperative myocardial infarction. In their recent report comparing different electrocardiographic (ECG) systems for detection of myocardial ischemia, Slogoff *et al.*<sup>4</sup> suggest that ECG monitoring with narrower-bandwidth filters provides higher sensitivity without loss of specificity in detecting myocardial ischemia, as compared with a standard diagnostic-bandwidth ECG.

We do not believe that their data support their conclusions. Their data show that, in patients known to be at risk for myocardial ischemia, ST-segment depression on the Spacelabs monitor in monitor mode (SL-MON) (0.5 Hz) was consistently more negative than on a standard ECG (0.05 Hz). The assumption that all 1.0-mm ST-segment depression observed on the SL-MON system represented myocardial ischemia requires confirmation with an independent measure of ischemia. Indeed, the authors noted that the SL-MON displayed up to 0.25-mm ST-segment depression at all heart rates from a simulator-generated *isoelectric* ST-segment signal. By definition, these ECG changes are artifactual, yet the authors conclude that the ECG changes detected using the SL-MON system were “not artifactual since specificity of the observation remains high.” However, none of the data in the current or previous studies allows calculation of the specificity of the SL-MON system. By recommending the SL-MON system for diagnosing intraoperative ischemia, the authors neglect the dangers of false positive or artifactual results.

E. LYNNE WILLIAMS, M.B., B.S., F.F.A.R.C.S.  
RENE TEMPLEHOFF, M.D.  
PAUL A. MODICA, M.D.  
W. SCOTT JELLISH, PH.D., M.D.

*Department of Anesthesiology  
Division of Neuroanesthesia  
Washington University School of Medicine  
St. Louis, Missouri 63110*

### REFERENCES

1. Gild W, Crilley P: Sudden cardiac arrest during epidural anesthesia (correspondence). *ANESTHESIOLOGY* 73:1296, 1990
2. Albin MS, Babinski M, Maroon JC: Anesthetic management of posterior fossa surgery in the sitting position. *Acta Anesthesiol Scand* 20:117–128, 1976
3. Naulty JS, Meisel LB, Datta S, Ostheimer GW: Air embolism during radical hysterectomy. *ANESTHESIOLOGY* 57:420–422, 1982
4. Spiess BD, Sloan MS, McCarthy RJ, Lubenow TR, Tuman KJ, Matz SD, Ivankovich AD: The incidence of air embolism during total hip arthroplasty. *J Clin Anesth* 1:25–30, 1988

(Accepted for publication March 18, 1991.)

The authors' implication that the SL-MON system may be appropriate, with “cautious interpretation,” for detecting myocardial ischemia in patients without coronary artery disease (CAD) is especially troubling. It is easy to envision the iatrogenic cascade of costs and complications when a patient is erroneously labeled as having had intraoperative myocardial ischemia and arrives in the recovery room with a nitroglycerin infusion, receives a cardiac consultation and overnight stay in the coronary care unit, and so forth. It is surprising that Dr. Keats, an outspoken critic of monitoring without demonstration of efficacy,<sup>5</sup> has concurred in the recommendation that the SL-MON-type system replace standard diagnostic-bandwidth ECG for patients with known CAD in the operating room. We continue to believe that standard (0.05 Hz) ECG filtering in the operating room is more appropriate for detection of myocardial ischemia in all patients, and we encourage manufacturers to incorporate diagnostic-mode ECG as the default setting in operating room ECG monitors.

RICHARD A. STEINBROOK, M.D.  
DONALD B. GOLDMAN, B.S., C.B.E.T.  
JONATHAN B. MARK, M.D.  
JAMES H. PHILIP, M.D.  
DANIEL B. RAEMER, PH.D.

*Department of Anesthesia  
Brigham and Women's Hospital*

75 Francis Street  
Boston, Massachusetts 02115

## REFERENCES

1. Slogoff S, Keats AS: Does perioperative myocardial ischemia lead to postoperative myocardial infarction? *ANESTHESIOLOGY* 62:107-114, 1985
2. Slogoff S, Keats AS: Further observations on perioperative myocardial ischemia. *ANESTHESIOLOGY* 65:539-542, 1986

Anesthesiology  
74:1172, 1991

*In Reply:*—We appreciate the opportunity to clarify some apparent confusion between what we demonstrated and what we then speculated. We demonstrated that in a population of patients with documented coronary artery disease, myocardial ischemia occurring before cardiopulmonary bypass (diagnosed as  $\geq 1.0$  mm of ST segment depression on a narrow-bandwidth SL-MON ECG system) was associated with an increased risk of postoperative myocardial infarction.<sup>1,2</sup> We next demonstrated that the ST segment recorded by the SL-MON narrow-bandwidth ECG system was consistently more negative than the standard diagnostic-bandwidth ECG (ECG-100) and as a consequence led to a diagnosis of myocardial ischemia twice as frequently as did the ECG-100.<sup>3</sup> These observations were supported by abundant data.

From these we speculated that myocardial ischemia diagnosed by the narrow-bandwidth SL-MON system had high sensitivity (more frequent diagnosis of ischemia) and high specificity, because: 1) the incidence of ST-segment displacement was directly related to heart rate; 2) ST-segment displacement responded to treatment by propranolol or nitroglycerin; 3) ST-segment displacement was a significant independent predictor of postoperative myocardial infarction; and 4) the magnitude of ST depression (including 1.0 mm) was directly related to incidence of postoperative myocardial infarction. We claim high specificity on this basis because there is no independent measure of myocardial ischemia applicable to this clinical situation for use as a "gold standard". Neither wall motion abnormalities nor coronary sinus lactate extraction possesses high specificity for myocardial ischemia. Without some "absolute" measure of ischemia, specificity of any of these indices cannot be calculated, but must be inferred.

We then speculated that the ECG-100 system and  $\geq 1.0$ -mm ST depression criterion, standards adopted for primary diagnosis of ischemic heart disease by exercise testing, may be too stringent for the ECG diagnoses of myocardial ischemia in patients with documented coronary artery disease in the perioperative setting. If tested, a criterion of less than 1.0-mm ST depression using either the ECG-100 or the SL-MON in these patients and this setting may prove to be diagnostic of myocardial ischemia with high specificity by the specificity criteria listed above.

Conversely, we also speculated that when an ECG system with the narrow bandwidth of SL-MON is used for the diagnosis of myocardial

3. Slogoff S, Keats AS: Does chronic treatment with calcium entry blocking drugs reduce perioperative myocardial ischemia? *ANESTHESIOLOGY* 68:676-680, 1988
4. Slogoff S, Keats AS, David Y, Igo SR: Incidence of perioperative myocardial ischemia detected by different electrocardiographic systems. *ANESTHESIOLOGY* 73:1074-1081, 1990
5. Keats AS: Anesthesia mortality in perspective (editorial). *Anesth Analg* 71:113-119, 1990

(Accepted for publication March 18, 1991.)

ischemia in patients not known to have coronary artery disease (as reported for patients undergoing cesarean section), displacements of  $\geq 1.0$  mm may not be diagnostic of myocardial ischemia (false positive) because of all the physical and patient factors influencing the position of the ST segment described in our discussion.<sup>3</sup> These factors will always generate some unpredictable false positive results in some patients at some time.

Finally, we did not recommend that the SL-MON replace the ECG-100 in operating rooms. We merely noted that the reason for a narrow-bandwidth ECG in the operating rooms still existed (electrical noise), and when used for patients with documented coronary artery disease, high specificity for the diagnosis of myocardial ischemia could be expected.

All of these speculations require confirmation or refutation by data directed specifically to each issue. The senior author remains quite consistently "an outspoken critic of monitoring without demonstration of efficacy".

STEPHEN SLOGOFF, M.D.  
ARTHUR S. KEATS, M.D.

Department of Cardiovascular Anesthesiology  
Texas Heart Institute  
P. O. Box 20345  
Houston, Texas 77225-0345

## REFERENCES

1. Slogoff S, Keats AS: Does perioperative myocardial ischemia lead to postoperative myocardial infarction? *ANESTHESIOLOGY* 62:107-114, 1985
2. Slogoff S, Keats AS: Further observations on perioperative myocardial ischemia. *ANESTHESIOLOGY* 65:539-542, 1986
3. Slogoff S, Keats AS, David Y, Igo SR: Incidence of perioperative myocardial ischemia detected by different electrocardiographic systems. *ANESTHESIOLOGY* 73:1074-1081, 1990

(Accepted for publication March 18, 1991.)

Anesthesiology  
74:1172-1173, 1991

## The Cervical Spines of Dwarfs

*To the Editor:*—I read with interest and appreciation the recent review by Berkowitz *et al.*<sup>1</sup> of anesthetic implications of dwarfism. I am sure that it will be a widely used reference. I was, however, troubled by a

few statements made and a few statements omitted by the authors in discussion of the cervical spine problems of these patients. The cervical spines of patients with pseudoachondroplasia, diastrophic dysplasia,
